# Supplementary material for: Spin-defect qubits in two-dimensional transition metal dichalcogenides operating at telecom wavelengths
Source: PubMed Central journal article supplement (PMC9723673; doi:10.1038/s41467-022-35048-0), 2022-12-06
Supplement: 41467_2022_35048_MOESM1_ESM.pdf [file 41467_2022_35048_MOESM1_ESM.pdf]

# Supplementary information

## Spin-defect qubits in two-dimensional transition metal dichalcogenides operating at telecom wavelengths

Yeonghun Lee<sup>1,2,†</sup>, Yaoqiao Hu<sup>1</sup>, Xiuyao Lang<sup>1</sup>, Dongwook Kim<sup>1</sup>, Kejun Li<sup>3</sup>, Yuan Ping<sup>4</sup>,

Kai-Mei C. Fu<sup>5,6</sup>, and Kyeongjae Cho<sup>1,\*</sup>

<sup>1</sup> Department of Materials Science and Engineering, The University of Texas at Dallas,  
Richardson, TX 75080, USA

<sup>2</sup> Department of Electronics Engineering, Incheon National University, Incheon 22012, Republic  
of Korea

<sup>3</sup> Department of Physics, University of California, Santa Cruz, CA 95064, USA

<sup>4</sup> Department of Chemistry and Biochemistry, University of California, Santa Cruz, CA 95064,  
USA

<sup>5</sup> Department of Physics, University of Washington, Seattle, WA 98195, USA

<sup>6</sup> Department of Electrical and Computer Engineering, University of Washington, Seattle, WA  
98195, USA

## **Corresponding authors**

† Email: [y.lee@inu.ac.kr](mailto:y.lee@inu.ac.kr)

\* Email: [kjcho@utdallas.edu](mailto:kjcho@utdallas.edu)



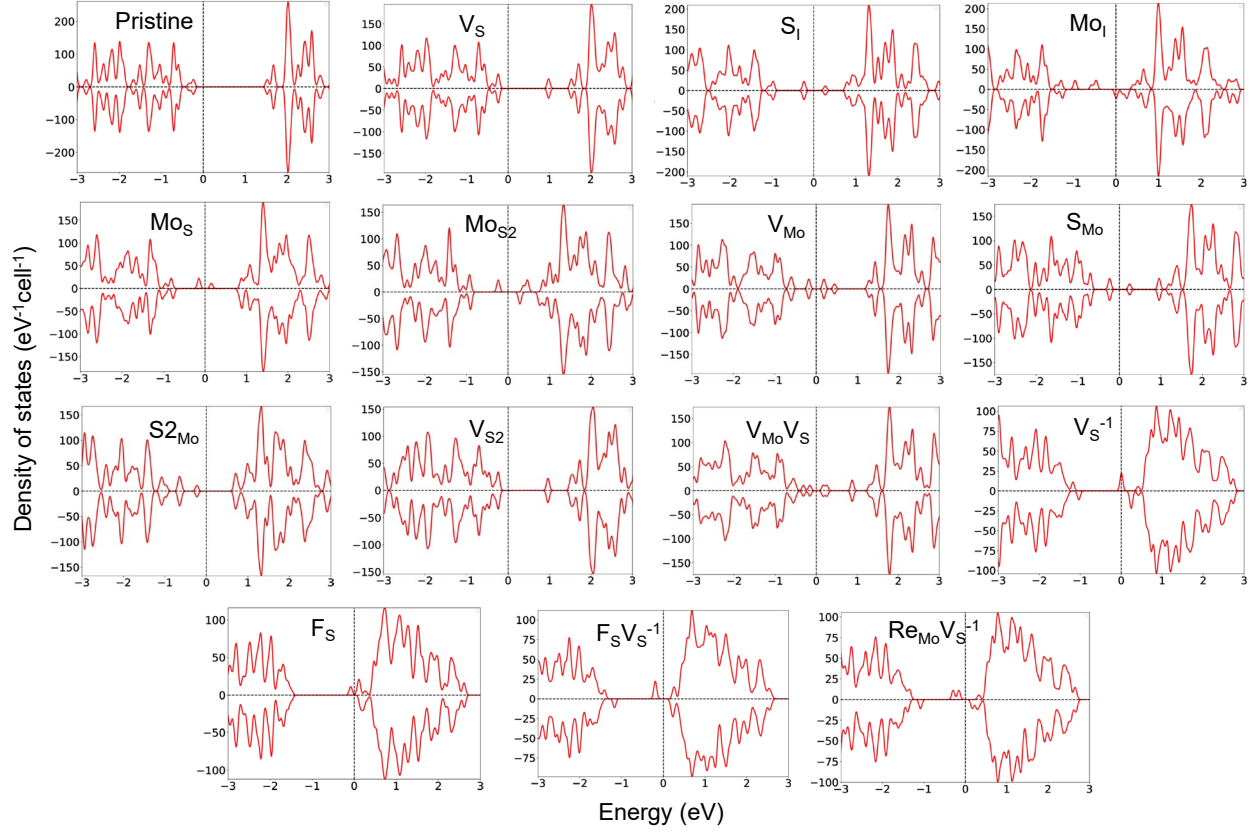

Supplementary Figure 1: Identification of the spin-triplet ground-state. Densities of states as a function of energy relative to the Fermi level for intrinsic (or native) and extrinsic defects in MoS<sub>2</sub> are calculated without using the hybrid functional for quick screening. Donor-vacancy defect complexes ( $F_S V_S^{-1}$  and  $Re_{Mo} V_S^{-1}$ ) exhibit the spin-triplet ground state but do not have spin-conserving intradefect optical transition without ionization of the defects. Mo<sub>S</sub> turns out to be the spin-triplet ground state with well-separated defect energy levels.

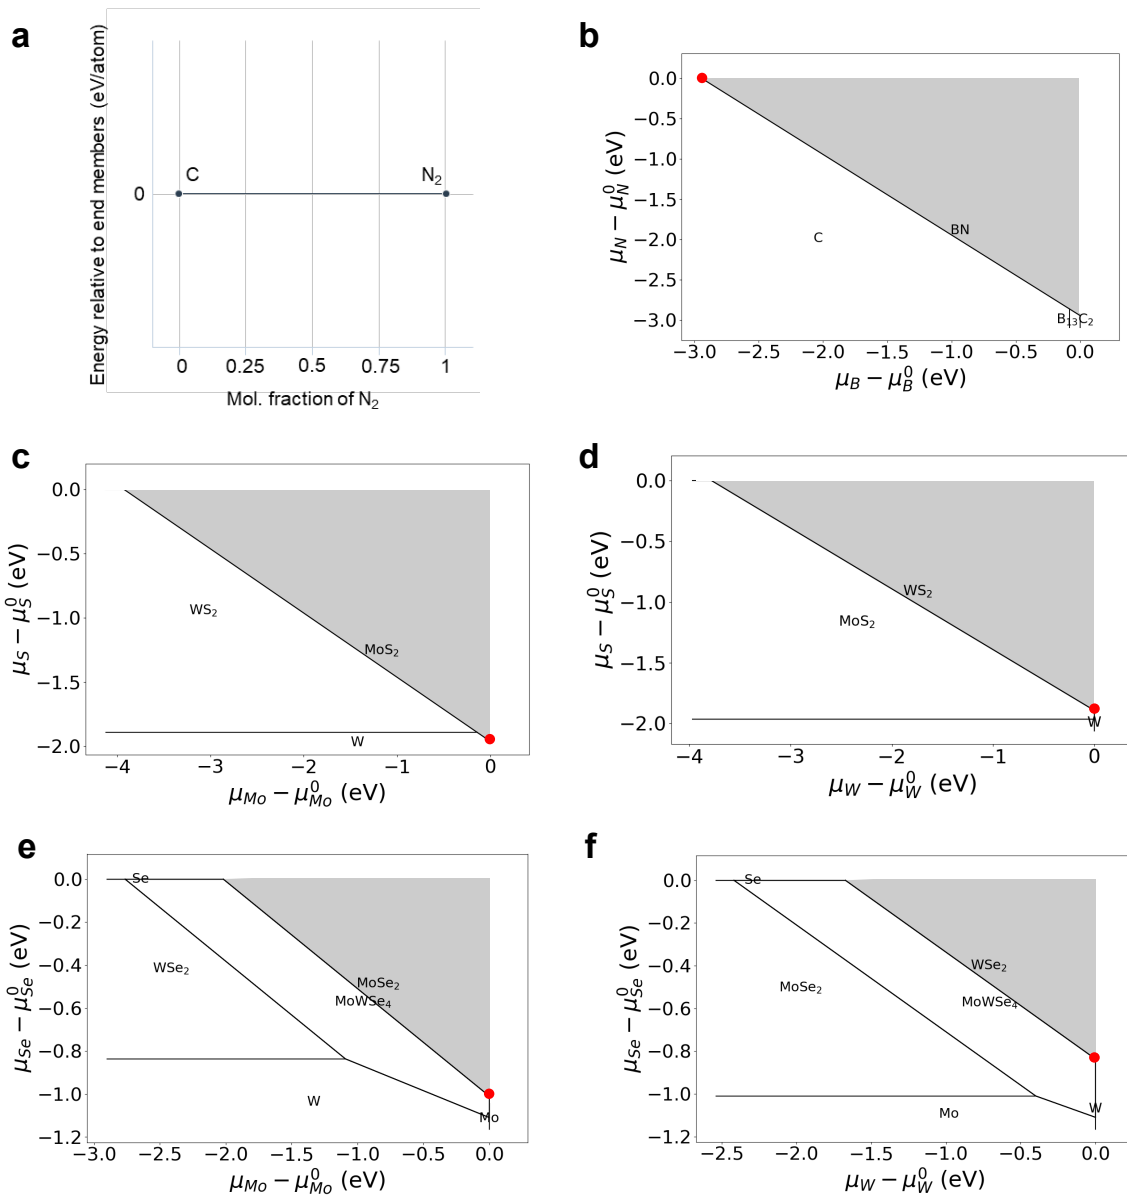

Supplementary Figure 2: Chemical potential range of chemical species. Phase diagrams provided by Materials Project<sup>1</sup> to determine chemical potentials for the formation energy diagrams. (a) Phase diagram of a binary compound C-N. Phase stability diagrams of ternary compounds (b) B-N-C in the B-N chemical potential space, (c) Mo-S-W in the Mo-S chemical potential space, (d) W-S-Mo in the W-S chemical potential space, (e) Mo-Se-W in the Mo-Se chemical potential space, and (f) W-Se-Mo in the W-Se chemical potential space. Red dots indicate the N-rich condition and the host metal rich conditions, showing lower defect formation energy.

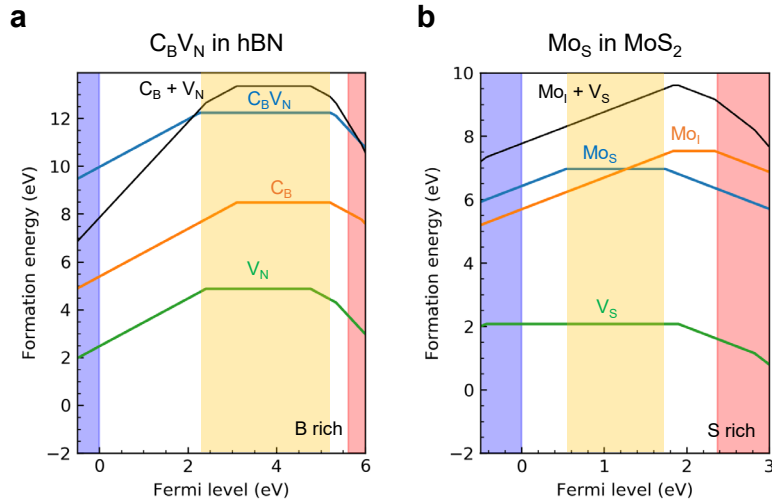

Supplementary Figure 3: Defect formation energy diagrams in other conditions. Defect formation energy diagrams for (a)  $C_B V_N$  in monolayer hBN and (b)  $Mo_S$  in monolayer  $MoS_2$  under different conditions with Figure 2(b,c). The B-rich shows higher formation energy of  $C_B V_N$  in hBN than the N-rich condition shown in Figure 2 (b). The S-rich condition shows higher formation energy of  $Mo_S$  in  $MoS_2$  than the Mo-rich condition shown in Figure 2 (c). This tendency will remain the same in the  $M_X$  defect family.

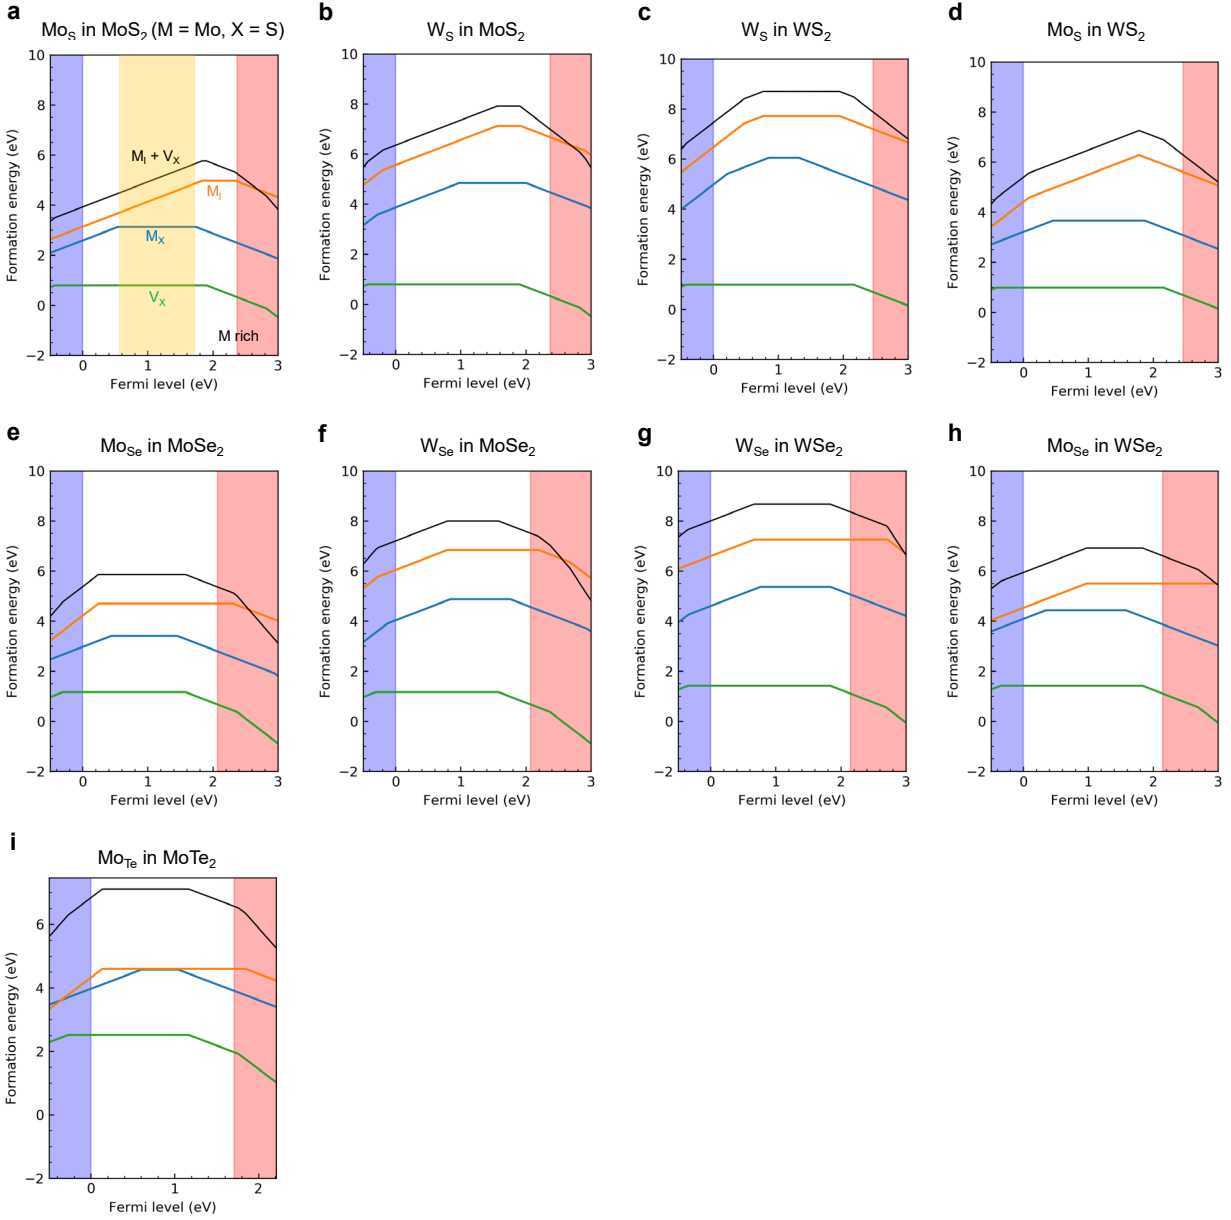

Supplementary Figure 4: Defect formation energy diagrams for all family. Defect formation energy diagrams for  $M_X$ ,  $V_X$ ,  $M_I$ , and two independent defects ( $M_I + V_X$ ) in monolayer  $MX_2$  under the host's M-rich condition. The formation energy of  $M_X$  defects is lower than the total formation energies of  $M_I + V_X$ , indicating that the formation of  $M_X$  defects is favorable when the system accommodates  $M_I$  and  $V_X$  defects.

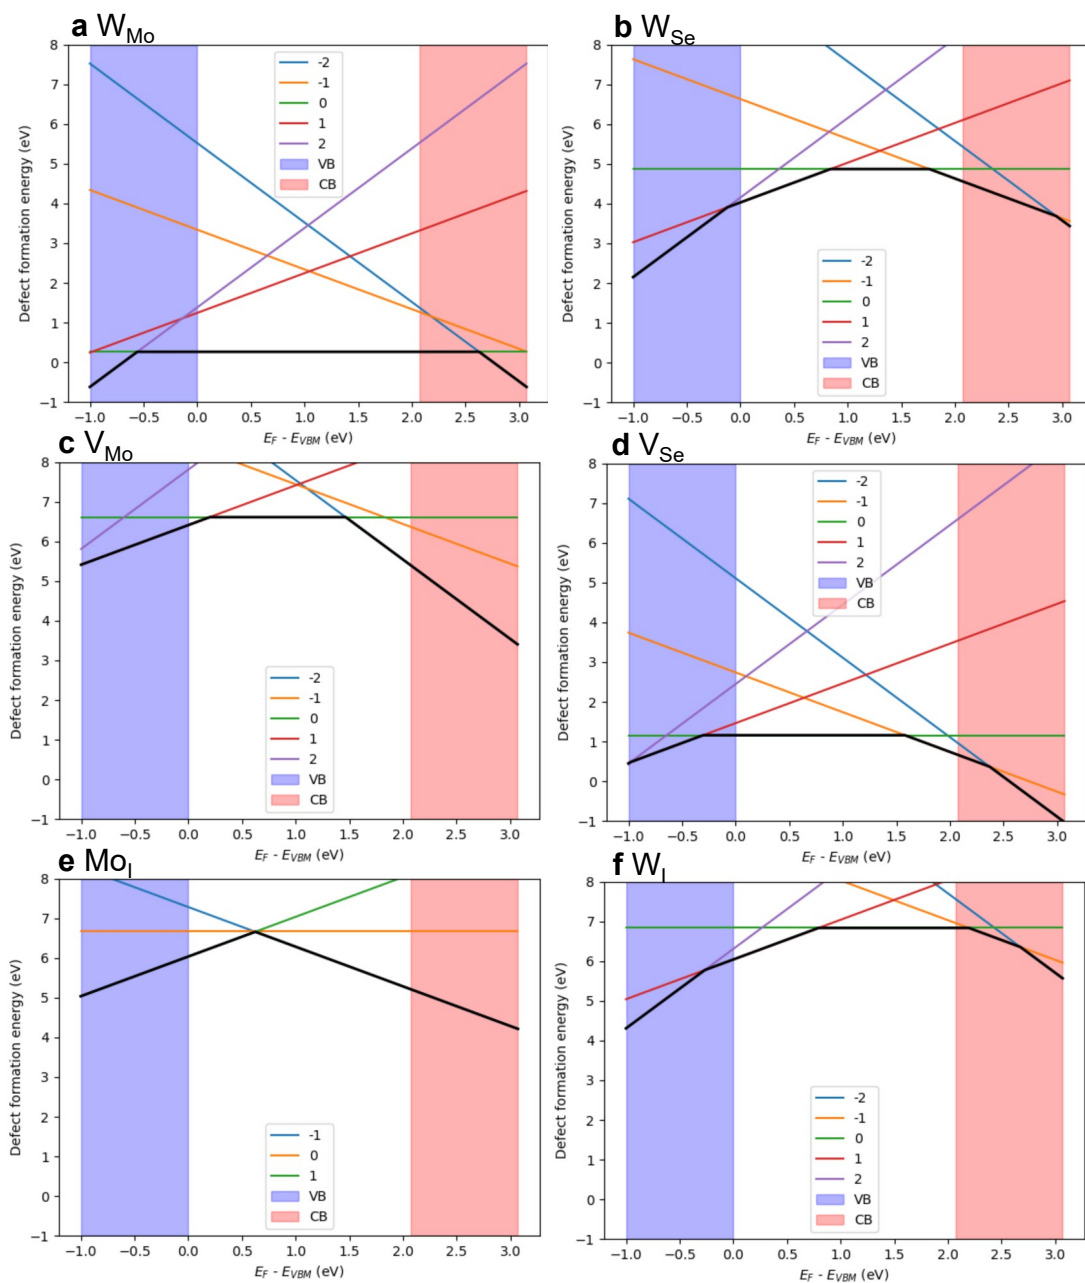

Supplementary Figure 5: Formation of competing defects. Defect formation energies of other competing defects with  $W_{Se}$  in  $MoSe_2$  under the host's Mo-rich condition.  $V_{Se}$  is much easier to be formed than  $V_{Mo}$ , and the stability of  $W_I$  is almost the same as that of  $Mo_I$ . Thus, once we introduce  $W_I$  in the presence of abundant  $V_{Mo}$ , the  $W_{Se}$  complex can be readily formed.



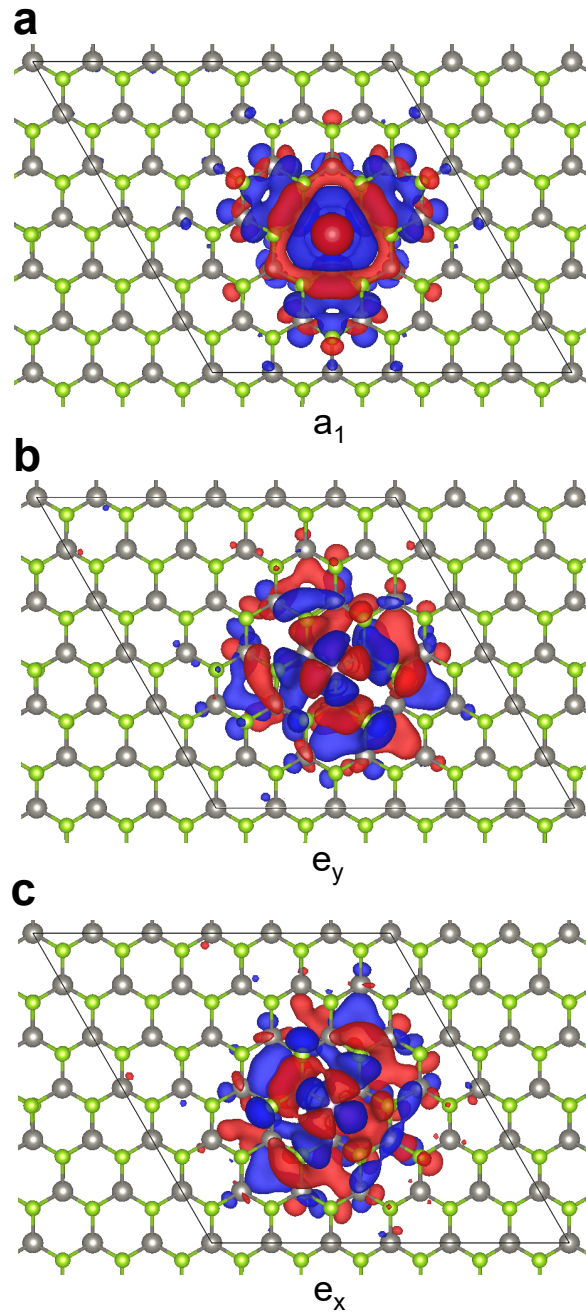

Supplementary Figure 6: Wavefunctions of the  $W_{Se}$  defect in  $MoSe_2$ . Real parts of wavefunctions of (a)  $a_1$ , (b)  $e_y$ , and (c)  $e_x$  states associated with  $W_{Se}$  in  $MoSe_2$ . The partial density of states analysis indicates that the  $e_x$ ,  $e_y$ , and  $a_1$  states are composed of  $0.36d_{xy} + 0.12d_{x^2-y^2}$ ,  $0.12d_{xy} + 0.36d_{x^2-y^2}$ ,  $0.48d_{z^2} + 0.03S$ , respectively.

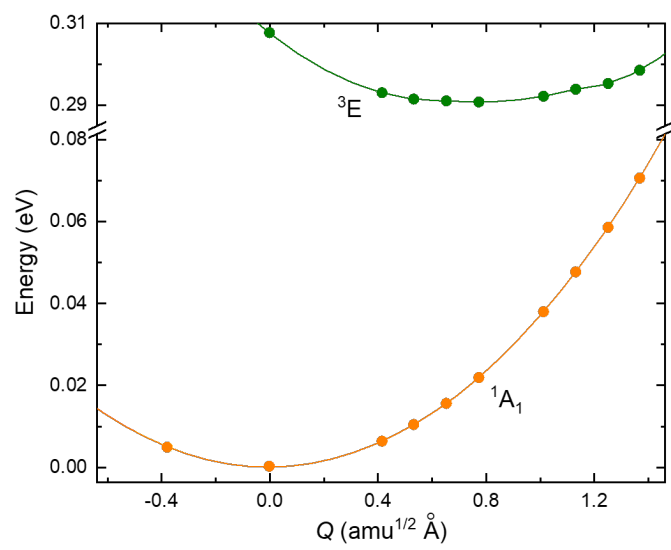

Supplementary Figure 7: Configuration coordinate diagrams for calculating the ISC transition rate.

Configuration coordinate diagrams for <sup>3</sup>E and <sup>1</sup>A<sub>1</sub> state of the W<sub>Se</sub> defect in MoSe<sub>2</sub>.

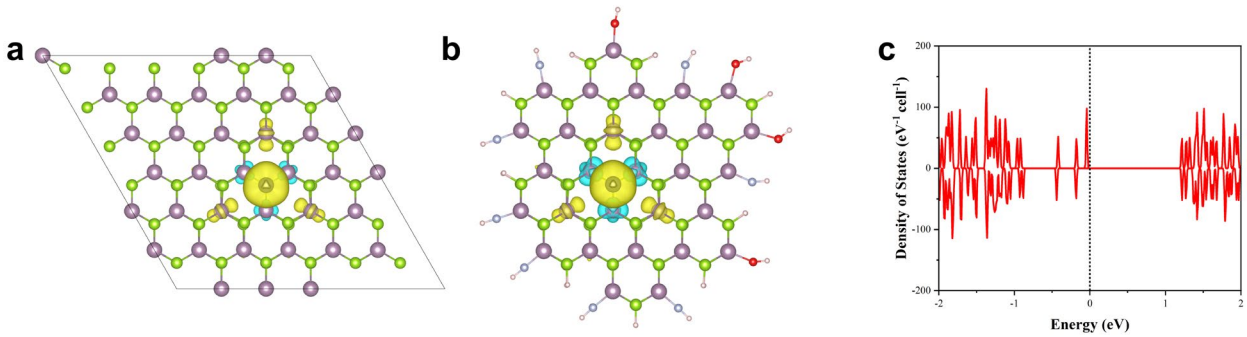

Supplementary Figure 8: Validation of the cluster model. Structures and spin densities for (a) periodic and (b) cluster W<sub>Se</sub> defect in MoSe<sub>2</sub> (isosurface level = 0.00296 e/bohr<sup>3</sup>). (c) Densities of states as a function of energy relative to the Fermi level for W<sub>Se</sub> cluster using B3LYP functional.

Supplementary Table 1: Physical quantities extracted from configuration coordinate diagrams.

| Hosts             | Defects          | Zero-field splitting tensors (GHz) |          |          |       |
|-------------------|------------------|------------------------------------|----------|----------|-------|
|                   |                  | $D_{xx}$                           | $D_{yy}$ | $D_{zz}$ | $D$   |
| Diamond           | $N_C V_C^{-1}$   | -0.95                              | -0.95    | 1.90     | 2.86  |
| hBN               | $C_B V_N$        | -0.91                              | -6.29    | 7.18     | 10.77 |
| MoS <sub>2</sub>  | Mo <sub>S</sub>  | -6.83                              | -6.83    | 13.67    | 20.51 |
|                   | W <sub>S</sub>   | -4.48                              | -4.49    | 8.96     | 13.44 |
| WS <sub>2</sub>   | W <sub>S</sub>   | -4.81                              | -4.81    | 9.63     | 14.44 |
|                   | Mo <sub>S</sub>  | -7.21                              | -7.21    | 14.43    | 21.65 |
| MoSe <sub>2</sub> | Mo <sub>Se</sub> | -6.37                              | -6.37    | 12.75    | 19.13 |
|                   | W <sub>Se</sub>  | -4.14                              | -4.14    | 8.29     | 12.43 |
| WSe <sub>2</sub>  | W <sub>se</sub>  | -4.29                              | -4.29    | 8.58     | 12.88 |
|                   | Mo <sub>Se</sub> | -6.60                              | -6.60    | 13.21    | 19.82 |
| MoTe <sub>2</sub> | Mo <sub>Te</sub> | -0.16                              | -0.16    | 0.31     | 0.47  |

Supplementary Table 2: Calculated hyperfine tensors for  $N_C V_C^{-1}$  in diamond,  $C_B V_N$  in hBN, and  $M_X$  in TMDs.

| Hosts                         | Defects                         | Nuclear spin                    | Numbers of equivalent sites | Hyperfine tensors (MHz)         |          |          |        |        |
|-------------------------------|---------------------------------|---------------------------------|-----------------------------|---------------------------------|----------|----------|--------|--------|
|                               |                                 |                                 |                             | $A_{xx}$                        | $A_{yy}$ | $A_{zz}$ |        |        |
| Diamond                       | $N_C V_C^{-1}$                  | $^{14}N$ ( $I = 1$ , 99.632%)   | 1                           | -2.9                            | -2.6     | -2.9     |        |        |
|                               |                                 | $^{15}N$ ( $I = 1/2$ , 0.368%)  | 1                           | 4.1                             | 3.6      | 4.1      |        |        |
|                               |                                 | $^{13}C$ ( $I = 1/2$ , 1.07%)   | 3                           | 145.0                           | 144.8    | 227.2    |        |        |
|                               |                                 | $^{13}C$ ( $I = 1/2$ , 1.07%)   | 6                           | 14.2                            | 14.1     | 19.9     |        |        |
| hBN                           | $C_B V_N$                       | $^{13}C$ ( $I = 1/2$ , 1.07%)   | 1                           | 474.7                           | 400.9    | 478.8    |        |        |
|                               |                                 | $^{10}B$ ( $I = 3$ , 19.9%)     | 1                           | 24.9                            | 22.2     | 26.4     |        |        |
|                               |                                 | $^{11}B$ ( $I = 3/2$ , 80.1%)   | 2                           | 74.4                            | 66.3     | 78.9     |        |        |
|                               |                                 | $^{14}N$ ( $I = 1$ , 99.632%)   | 2                           | 7.3                             | 7.2      | 9.9      |        |        |
|                               |                                 | $^{15}N$ ( $I = 1/2$ , 0.368%)  | 2                           | -10.3                           | -10.1    | -13.9    |        |        |
|                               |                                 | $^{95}Mo$ ( $I = 5/2$ , 15.92%) | 1                           | -114.9                          | -37.5    | -114.9   |        |        |
| MoS <sub>2</sub>              | Mo <sub>S</sub>                 | $^{97}Mo$ ( $I = 5/2$ , 9.55%)  | 1                           | -117.3                          | -38.3    | -117.3   |        |        |
|                               |                                 | $^{95}Mo$ ( $I = 5/2$ , 15.92%) | 3                           | 16.3                            | 9.4      | 18.8     |        |        |
|                               |                                 | $^{97}Mo$ ( $I = 5/2$ , 9.55%)  | 3                           | 16.7                            | 9.6      | 19.2     |        |        |
|                               |                                 | $^{33}S$ ( $I = 3/2$ , 0.76%)   | 6                           | 13.1                            | 12.9     | 15.4     |        |        |
|                               | W <sub>S</sub>                  | $^{183}W$ ( $I = 1/2$ , 14.31%) | 1                           | 296.3                           | 208.9    | 296.3    |        |        |
|                               |                                 | $^{95}Mo$ ( $I = 5/2$ , 15.92%) | 3                           | 12.5                            | 6.5      | 12.6     |        |        |
|                               |                                 | $^{97}Mo$ ( $I = 5/2$ , 9.55%)  | 3                           | 12.7                            | 6.7      | 12.8     |        |        |
|                               |                                 | $^{33}S$ ( $I = 3/2$ , 0.76%)   | 6                           | 15.9                            | 14.7     | 17.2     |        |        |
|                               |                                 | WS <sub>2</sub>                 | W <sub>S</sub>              | $^{183}W$ ( $I = 1/2$ , 14.31%) | 1        | 276.0    | 184.2  | 276.0  |
|                               |                                 |                                 |                             | $^{183}W$ ( $I = 1/2$ , 14.31%) | 3        | -24.8    | -20.3  | -26.4  |
| $^{33}S$ ( $I = 3/2$ , 0.76%) | 6                               |                                 |                             | 16.1                            | 15.5     | 17.3     |        |        |
| Mo <sub>S</sub>               | $^{95}Mo$ ( $I = 5/2$ , 15.92%) |                                 | 1                           | -102.7                          | -19.8    | -102.8   |        |        |
|                               | $^{97}Mo$ ( $I = 5/2$ , 9.55%)  |                                 | 1                           | 48.5                            | 40.8     | 54.4     |        |        |
|                               | $^{183}W$ ( $I = 1/2$ , 14.31%) |                                 | 3                           | -30.6                           | -25.7    | -34.3    |        |        |
| MoSe <sub>2</sub>             | Mo <sub>Se</sub>                | $^{33}S$ ( $I = 3/2$ , 0.76%)   | 6                           | 13.1                            | 13.0     | 14.9     |        |        |
|                               |                                 | $^{95}Mo$ ( $I = 5/2$ , 15.92%) | 1                           | -137.9                          | -65.1    | -138.0   |        |        |
|                               |                                 | $^{97}Mo$ ( $I = 5/2$ , 9.55%)  | 1                           | -140.8                          | -66.5    | -140.9   |        |        |
|                               |                                 | $^{95}Mo$ ( $I = 5/2$ , 15.92%) | 3                           | 19.6                            | 11.1     | 20.7     |        |        |
|                               |                                 | $^{97}Mo$ ( $I = 5/2$ , 9.55%)  | 3                           | 20.0                            | 11.3     | 21.2     |        |        |
|                               |                                 | $^{77}Se$ ( $I = 1/2$ , 7.63%)  | 6                           | 59.5                            | 59.1     | 74.2     |        |        |
|                               | W <sub>Se</sub>                 | $^{183}W$ ( $I = 1/2$ , 14.31%) | 1                           | 332.9                           | 253.0    | 333.0    |        |        |
|                               |                                 | $^{95}Mo$ ( $I = 5/2$ , 15.92%) | 3                           | 14.6                            | 8.4      | 16.5     |        |        |
|                               |                                 | $^{97}Mo$ ( $I = 5/2$ , 9.55%)  | 3                           | 14.9                            | 8.6      | 16.8     |        |        |
|                               |                                 | $^{77}Se$ ( $I = 1/2$ , 7.63%)  | 6                           | 68.2                            | 65.4     | 78.2     |        |        |
| WSe <sub>2</sub>              | W <sub>Se</sub>                 | $^{183}W$ ( $I = 1/2$ , 14.31%) | 1                           | 302.3                           | 218.4    | 302.4    |        |        |
|                               |                                 | $^{183}W$ ( $I = 1/2$ , 14.31%) | 3                           | -31.6                           | -25.5    | -31.7    |        |        |
|                               |                                 | $^{77}Se$ ( $I = 1/2$ , 7.63%)  | 6                           | 71.7                            | 70.3     | 80.3     |        |        |
|                               | Mo <sub>Se</sub>                | $^{95}Mo$ ( $I = 5/2$ , 15.92%) | 1                           | -120.4                          | -42.0    | -120.4   |        |        |
|                               |                                 | $^{97}Mo$ ( $I = 5/2$ , 9.55%)  | 1                           | 57.3                            | 48.0     | 61.5     |        |        |
|                               |                                 | $^{183}W$ ( $I = 1/2$ , 14.31%) | 3                           | -36.2                           | -30.3    | -38.8    |        |        |
|                               |                                 | $^{77}Se$ ( $I = 1/2$ , 7.63%)  | 6                           | 61.4                            | 61.3     | 72.5     |        |        |
|                               |                                 | MoTe <sub>2</sub>               | Mo <sub>Te</sub>            | $^{95}Mo$ ( $I=5/2$ , 15.92%)   | 1        | -160.9   | -150.8 | -183.4 |
| $^{97}Mo$ ( $I=5/2$ , 9.55%)  | 1                               |                                 |                             | -164.3                          | -153.9   | -187.2   |        |        |
| $^{95}Mo$ ( $I=5/2$ , 15.92%) | 3                               |                                 |                             | 0.1                             | 0.1      | -0.1     |        |        |
| $^{97}Mo$ ( $I=5/2$ , 9.55%)  | 3                               |                                 |                             | 0.1                             | 0.1      | -0.1     |        |        |
| $^{77}Te$ ( $I=1/2$ , 0.89%)  | 6                               |                                 |                             | -7.8                            | -5.3     | -8.7     |        |        |
| $^{77}Te$ ( $I=1/2$ , 7.07%)  | 6                               |                                 |                             | -9.4                            | -6.3     | -10.5    |        |        |

## References

1. Jain, A. *et al.* Commentary: The Materials Project: A materials genome approach to accelerating materials innovation. *APL Materials* **1**, 011002 (2013).
